# Supplementary material for: Photocatalytic hydrogen generation over CdS–metalosilicate composites under visible light irradiation
Source: Royal Society of Chemistry journal article supplement (doi:10.1039/c3nj01348k), 2014-01-01
Supplement: c3nj01348k.pdf [file c3nj01348k.pdf]

## Electronic Supplementary Information:

# Photocatalytic Hydrogen Generation over CdS/Metalosilicate Composites under Visible Light Irradiation

M. Khatamian <sup>a</sup>, M. Saket Oskoui <sup>1,a</sup>, M. Haghighi <sup>b,c</sup>

New Journal of Chemistry

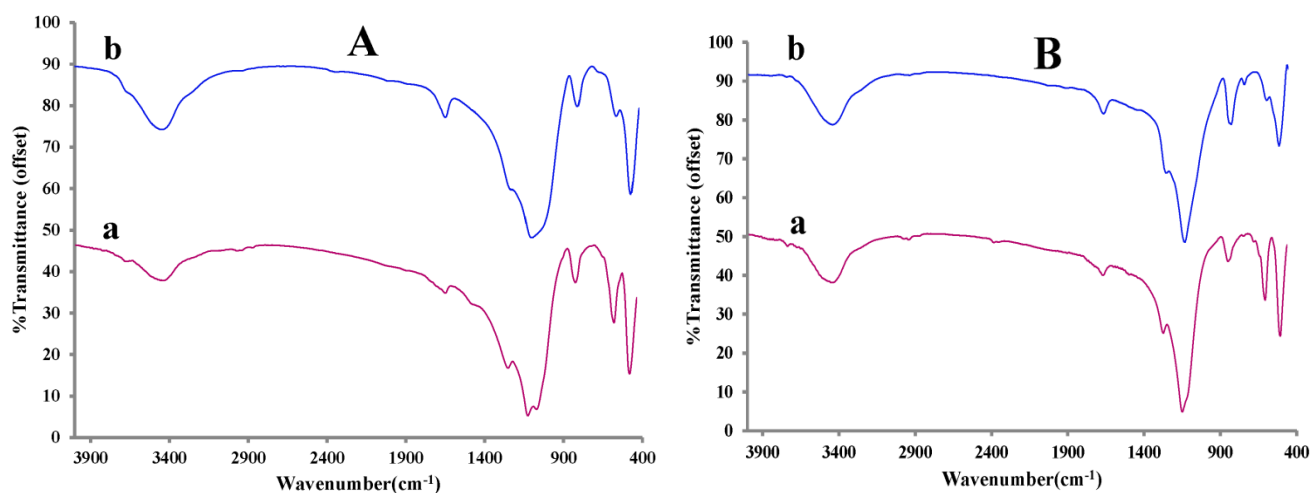

Fig.1S. FTIR spectra of (A) CdS(I)/F1 catalyst (a) before and (b) after the hydrogen production process; (B) the CdS(I)/Z1 catalyst (a) before and (b) after the hydrogen production process.

\* Corresponding author:

Email: mso\_86@yahoo.com, Tel: +98-411-3393129, Fax: +98-411-3340191.

Postal address: Physical Inorganic Chemistry Research Laboratory, Department of Inorganic Chemistry, Faculty of Chemistry, Tabriz, Iran.

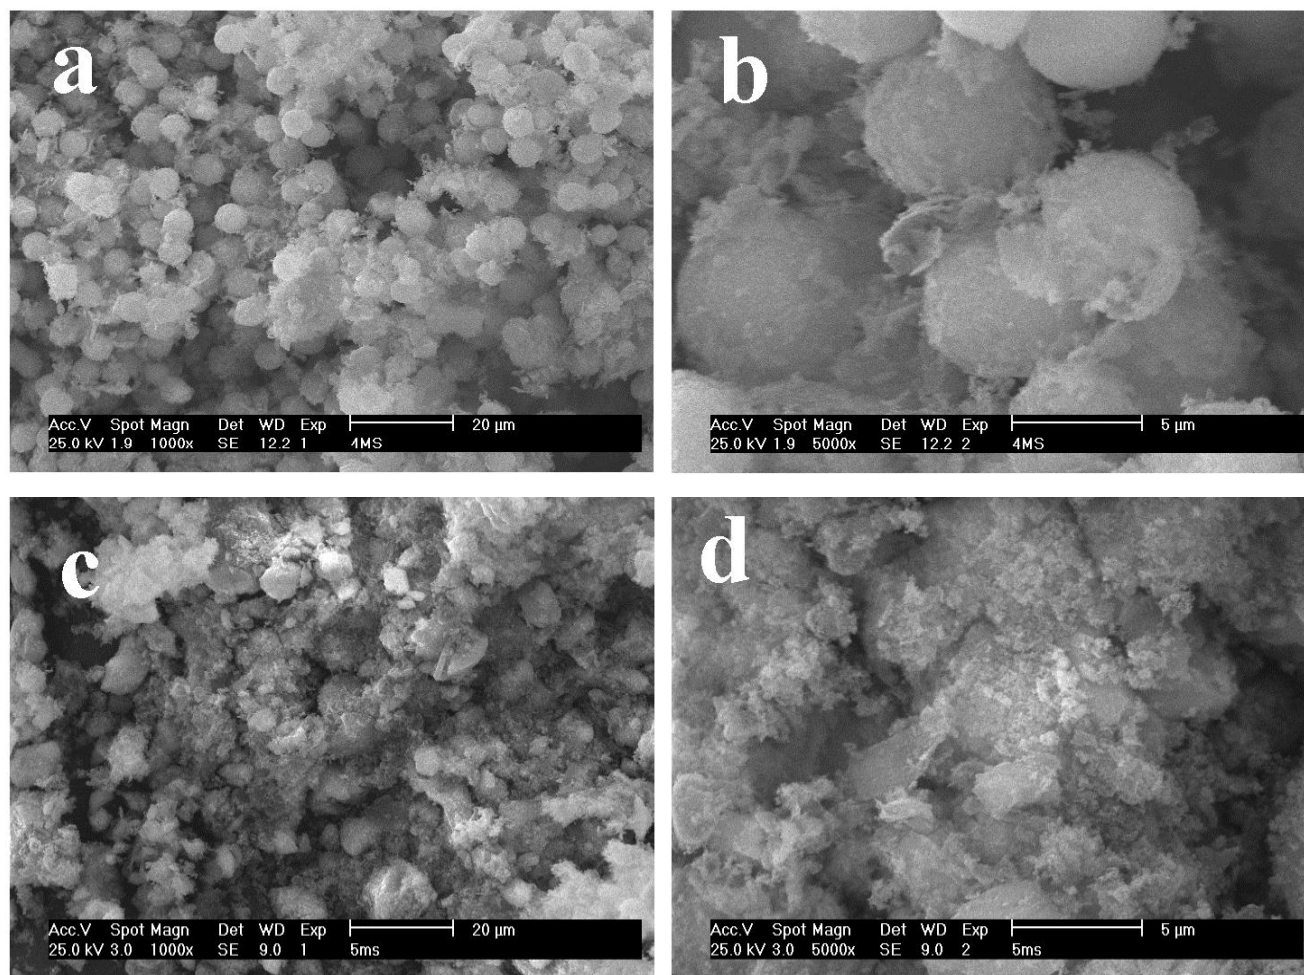

Fig.2S. SEM images of (A) CdS(I)/F1 catalyst (a) and (b); (B) CdS(I)/Z1 catalyst (c) and (d).

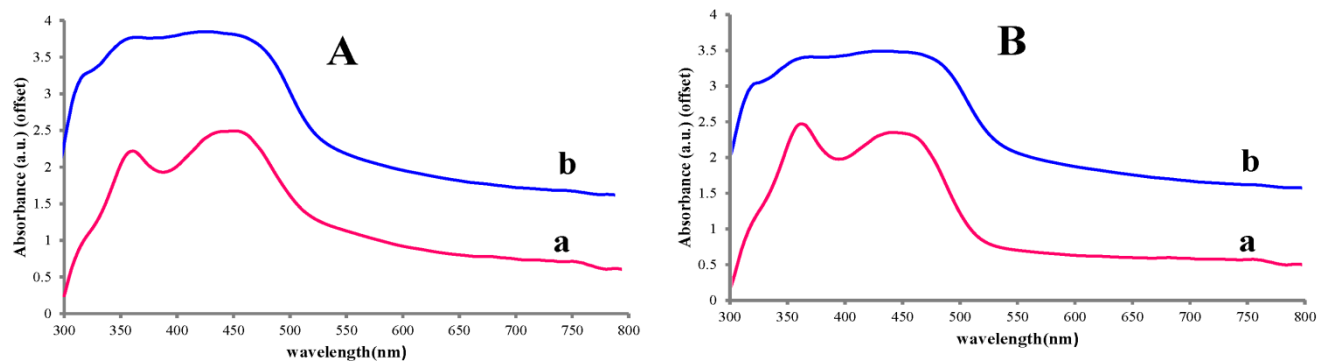

Fig.3S. UV-vis diffuse reflectance spectra of (A) CdS(I)/F1 catalyst (a) before and (b) after the hydrogen production process; (B) CdS(I)/Z1 catalyst (a) before and (b) after the hydrogen production process.
